# Supplementary material
Source: PubMed Central journal article supplement (PMC5652609)

SUPPLEMENTARY DATA

**Supplementary Figure 1. Effect of insulin on IP-10 release in human islets.** Isolated human islets were pretreated with IL-1 $\beta$  for 6 h before exposure to 1-100 nM recombinant insulin in the presence of low 2.8 mM and high 16.7 mM glucose and assayed for IP-10 release by ELISA. Data are represented as mean values with STD of 3 independent experiments.

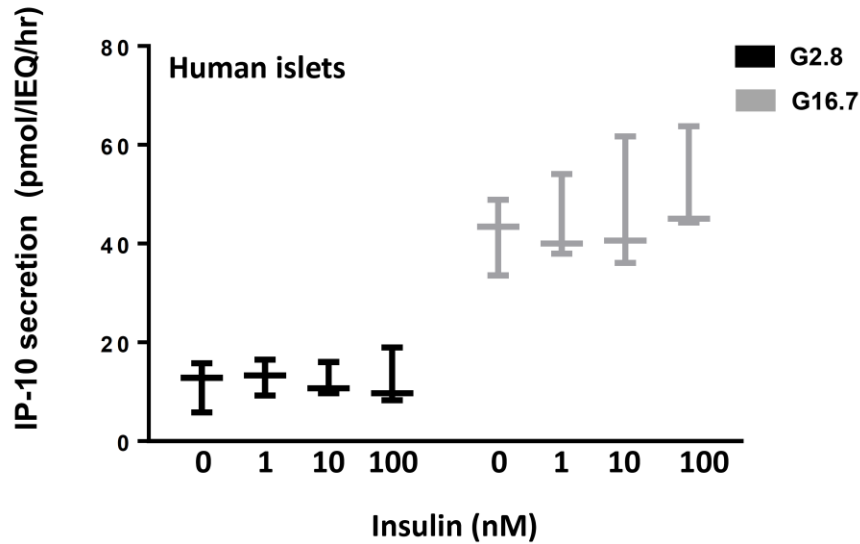

**Supplementary Figure 2. Effect of MAPK inhibitors on insulin secretion.** Isolated human islets were pretreated for 15 min with 10  $\mu$ M MAP inhibitors and placed in low 2.8 mM and high 16.7 mM glucose medium for static incubation for 2 h and assayed for insulin release by ELISA. Data are represented as mean values with STD of 3 independent experiments.

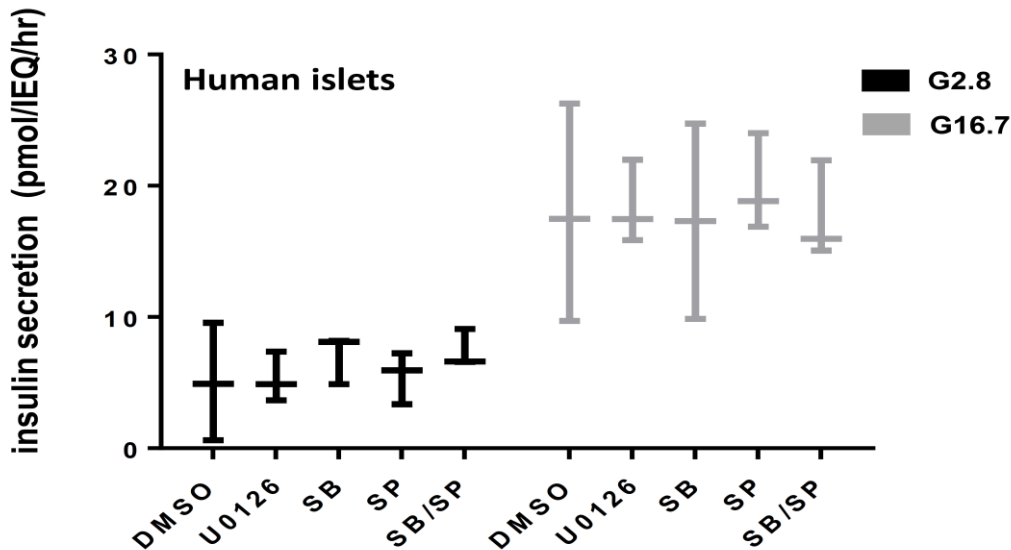

SUPPLEMENTARY DATA

**Supplementary Figure 3. Effect of MAPK inhibitors on IP10 gene expression.** MIN6 cells were pretreated for 15 min with 1  $\mu$ M ERK inhibitor PD0325901, p38 inhibitor VX-745, JNK inhibitor JNK-IN-8, or combination of JNK and p38 inhibitors (JNK/VX) and placed in low 2.8 mM and high 16.7 mM glucose medium for 2 h. Cells were harvested for mRNA and converted to cDNA to be assayed for gene expression by QPCR. Asterisks denote statistical significance (\* $p < 0.05$ , \*\* $p < 0.01$ , \*\*\* $p < 0.001$ ) in mean values compared to untreated control (\* above bar) or condition indicated by lines (\* above line) based on two-tailed Student's t-test. Data are represented as individual plots of means of replicates and mean values of 3 independent experiments are indicated by bars with STD.

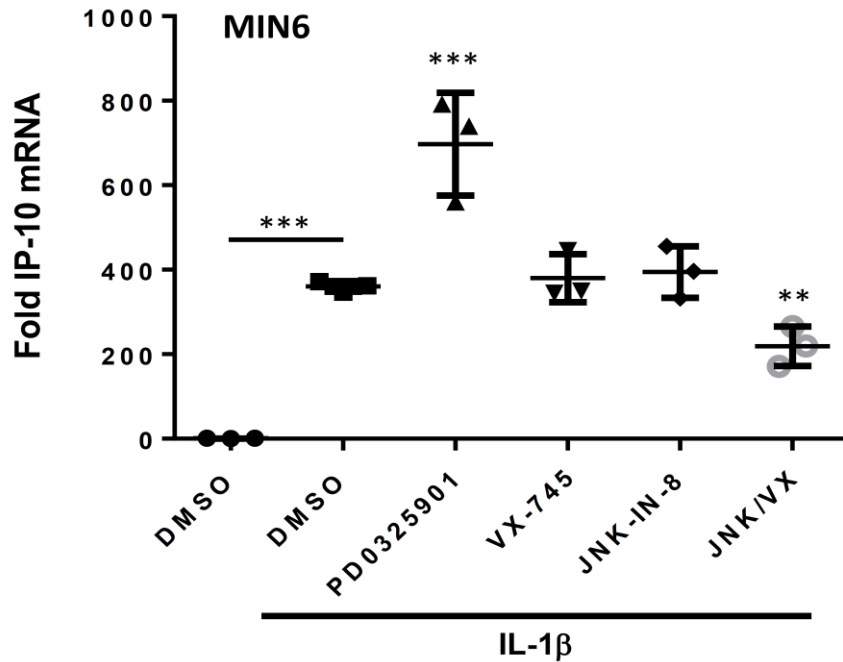

SUPPLEMENTARY DATA

**Supplementary Figure 4. Effect of IP-10 on insulin secretion and apoptosis in islets and beta cells.**

(A) Isolated human islets were treated with 1-100 nM recombinant IP-10 in static incubation with low 2.8 mM and high 16.7 mM glucose for 2 h and assayed for insulin release by ELISA. (B) MIN6 cells were treated with 5 ng/mL IL-1 $\beta$ , 10 ng/mL TNF- $\alpha$ , and 50 ng/mL IFN- $\gamma$  cytokines (CC) or 100 ng/mL for 24 h and assayed for apoptosis by Promega Caspase-Glo 3/7 assay. Asterisks denote statistical significance (\* $p < 0.05$ ) in mean values based on one-way ANOVA. Data are represented as mean values with STD of 3 independent experiments.

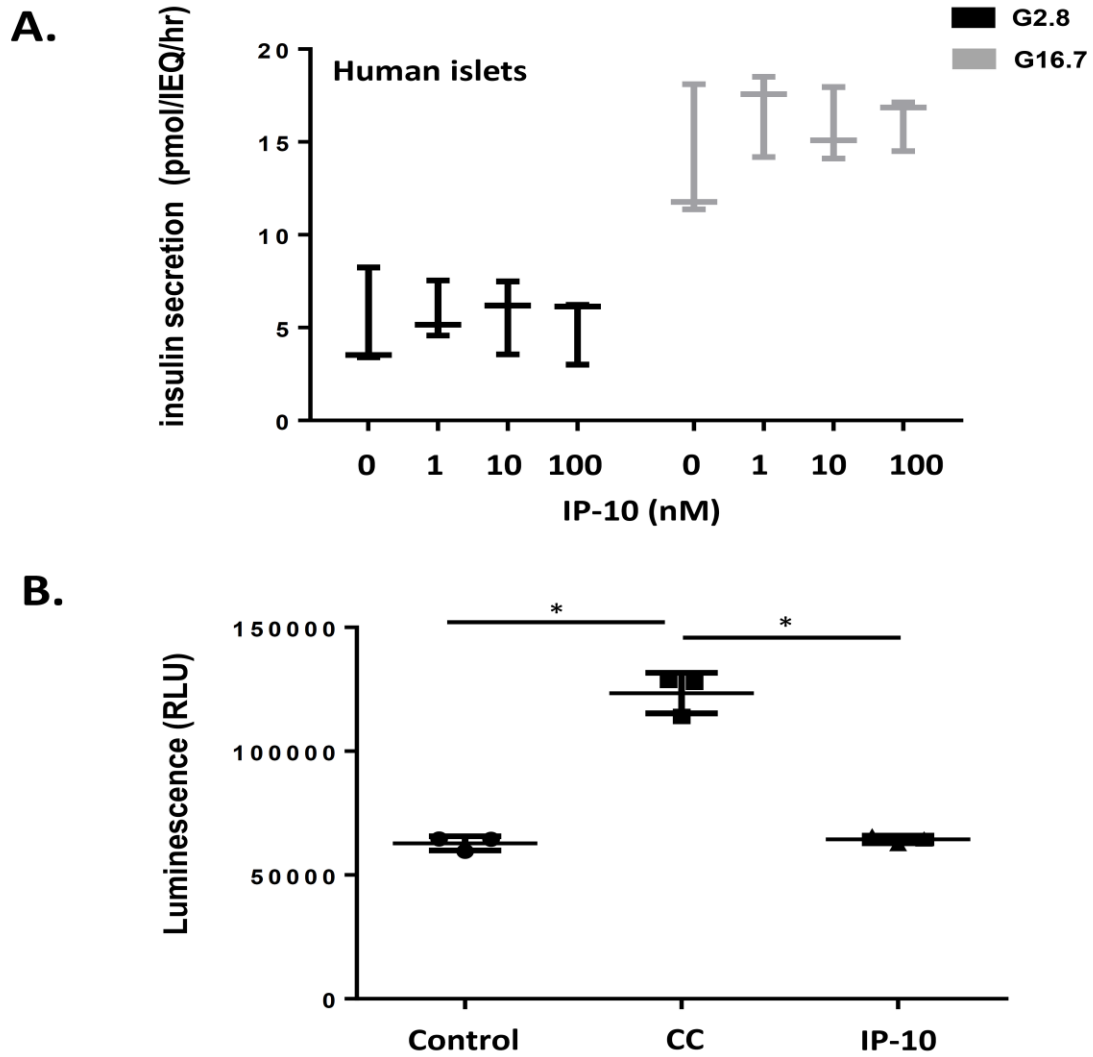

Supplement: DB170578SupplementaryData.pdf [file DB170578SupplementaryData.pdf]
